# Supplementary material for: A Portable Smart-Phone Readout Device for the Detection of Mercury Contamination Based on an Aptamer-Assay Nanosensor
Source: MDPI journal article supplement (doi:10.3390/s16111871), 2016-11-08
Supplement: s1 [file s1]

# Supplementary Materials: A Portable Smart-Phone Readout Device for the Detection of Mercury Contamination Based on an Aptamer-Assays Nanosensor

Wei Xiao, Meng Xiao, Qiangqiang Fu, Shiting Yu, Haicong Shen, Hongfen Bian and Yong Tang

Most real-world systems consist of mixtures of heavy metal ions; therefore, we performed an experiment to detect the mixtures samples of  $\text{Hg}^{2+}$  and other ions. Interference effects of 50 ng/mL levels of various metal ions ( $\text{Fe}^{2+}$ ,  $\text{Ag}^+$  and  $\text{Pb}^{2+}$ ) were added to 10 ng/mL  $\text{Hg}^{2+}$  solutions. The result demonstrates high selectivity using the smartphone-based microwell reader (MR S-phone) system (Figure S1).

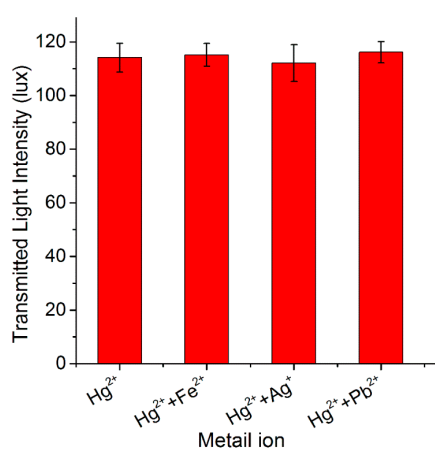

**Figure S1.** The selectivity of the smartphone-based microwell reader (MR S-phone) detection method.
